# Supplementary material for: The Impact of Climate on the Energetics of Overwintering Paper Wasp Gynes (Polistes dominula and Polistes gallicus)
Source: MDPI journal article supplement (doi:10.3390/insects14110849), 2023-10-31
Supplement: s1 [file s1]

## Article

# Energetics of overwintering paper wasp gynes from differing climates (*Polistes dominula* and *Polistes gallicus*).

Helmut Kovac<sup>1\*</sup>, Helmut Käfer<sup>1</sup>, Iacopo Petrocelli<sup>2</sup>, Astrid B. Amstrup<sup>1,3</sup>, Anton Stabentheiner<sup>1\*</sup>

<sup>1</sup> Institute of Biology, University of Graz, Universitätsplatz 2, 8010 Graz, Austria

<sup>2</sup> Dipartimento di Biologia, Università di Firenze, Via Madonna del Piano, 6 – 50019 Sesto Fiorentino, Italy

<sup>3</sup> Department of Biology - Genetics, Ecology and Evolution, 8000 Aarhus C, Denmark

\* Correspondence: [helmut.kovac@uni-graz.at](mailto:helmut.kovac@uni-graz.at), [anton.stabentheiner@uni-graz.at](mailto:anton.stabentheiner@uni-graz.at)

## Supplementary information

Table S1. Statistical details and the fit parameters of fit functions in Figure 3 of the individual and the mass specific standard metabolic rate ( $SMR=y_0 + A \cdot \exp(R_0 \cdot T_a)$ ) of paper wasp gynes from Austria (*P. dominula* AT) and Italy (*P. dominula* IT, *P. gallicus* IT), data from Kovac et al. [32].

### Individual metabolic rate

| Species               | Parameter      |         |                | R <sup>2</sup> | P       | N    |
|-----------------------|----------------|---------|----------------|----------------|---------|------|
|                       | y <sub>0</sub> | A       | R <sub>0</sub> |                |         |      |
| <i>P. dominula</i> AT | -0.55425       | 0.4633  | 0.09114        | 0.51872        | <0.0001 | 929  |
| <i>P. dominula</i> IT | -0.01822       | 0.06261 | 0.16594        | 0.78001        | <0.0001 | 674  |
| <i>P. gallicus</i> IT | -0.13431       | 0.1457  | 0.1082         | 0.70700        | <0.0001 | 1019 |

### Mass specific metabolic rate

| Species               | Parameter      |         |                | R <sup>2</sup> | P       | N    |
|-----------------------|----------------|---------|----------------|----------------|---------|------|
|                       | y <sub>0</sub> | A       | R <sub>0</sub> |                |         |      |
| <i>P. dominula</i> AT | -0.43032       | 0.35971 | 0.09114        | 0.51872        | <0.0001 | 929  |
| <i>P. dominula</i> IT | -0.01648       | 0.05661 | 0.16594        | 0.78001        | <0.0001 | 674  |
| <i>P. gallicus</i> IT | -0.18273       | 0.19824 | 0.10820        | 0.70700        | <0.0001 | 1019 |
